# Supplementary material for: Microarray-guided discovery of two-photon (2P) small molecule probes for live-cell imaging of cysteinyl cathepsin activities
Source: Royal Society of Chemistry journal article supplement (doi:10.1039/c2cc33476c), 2012-01-01

## **Supporting Information:**

# **Microarray-guided discovery of two-photon (2P) small molecule probes for live-cell imaging of cysteinyl cathepsin activities**

Zhenkun Na,<sup>a</sup> Lin Li,<sup>a</sup> Mahesh Uttamchandani,<sup>\*b</sup> and Shao Q. Yao<sup>\*a</sup>

<sup>a</sup>Department of Chemistry, National University of Singapore, <sup>b</sup>Defence Medical and Environmental Research Institute DSO National Laboratories,

e-mail: [chmyaosq@nus.edu.sg](mailto:chmyaosq@nus.edu.sg)

### **1. General information.**

All chemicals were purchased from commercial vendors and used without further purification. Tetrahydrofuran (THF) was distilled over sodium benzophenone and used immediately. All reactions requiring anhydrous conditions were carried out under an argon or nitrogen atmosphere using oven-dried glassware. HPLC grade solvents are used for all other solvents. Reaction progress was monitored by TLC on precoated silica plates (Merck 60 F<sup>254</sup>, 0.25 μm) and spots were visualized by UV, iodine or KMnO<sub>4</sub> stain. Flash column chromatography was carried out using Merck 60 F<sup>254</sup> 0.040-0.063 μm silica gel. <sup>1</sup>H and <sup>13</sup>C NMR spectra were recorded on Bruker Avance ACF300 or AMX500 spectrometers. Chemical shifts are reported in parts per million relative to internal standard trimethylsilane (Si(CH<sub>3</sub>)<sub>4</sub> = 0.00 ppm) or residual solvent peaks (CDCl<sub>3</sub> = 7.26 ppm, MeOD = 3.31 ppm, DMSO = 2.50 ppm). UV-vis absorption/extinction and fluorescence spectra were measured by using a Shimadzu UV-vis spectrophotometer and a Perkin Elmer LS50 spectrofluorometer, respectively. The two-photon excitation fluorescence measurements were performed by using a Spectra Physics femtosecond Ti: sapphire oscillator (Tsunami) as the excitation source. The output laser pulses have a tunable center wavelength from 750 nm to 860 nm with pulse duration of 40 fs and a repetition rate of 76 MHz. The laser beam was focused onto the samples that were contained in a cuvette with path length of 1 cm. The emission from the samples was collected at 90° angle by a pair of lenses and an optical fiber that was connected to a monochromator (Acton, Spectra Pro 2300i) coupled with CCD (Princeton Instruments, Pixis 100B) system. A short pass filter with cut-off wavelength at 700 nm was placed before the spectrometer to minimize the scattering from the pump beam. All the measurements were performed at room temperature.

### **2. Procedures for the synthesis of 105 aldehyde library.**

The Synthesis of Fmoc-Lys(Mtt)-CHO was based on previously published

Supplementary Material (ESI) for Chemical Communications

This journal is (c) The Royal Society of Chemistry 2011

procedures.<sup>1</sup> AM-Resin (15.00 g, 7.50 mmol) was swelled in DMF for approximately 30 min and then filtered. Fmoc-Gly-OH (4.0 eq., 8.90 g, 30 mmol), and standard coupling reagents, HOBT (4.0 eq., 4.05 g, 30 mmol), HBTU (4.0 eq., 11.93 g, 30 mmol) and DIEA (8.0 eq., 10.20 mL, 30 mmol) were dissolved in 150 mL of DMF. The mixture was added to the resin and the reaction was stirred overnight. The resin was washed nine times, alternating between DCM/DMF and then dried *in vacuo*. Fmoc was deprotected using a 20% piperidine solution (in DMF) for 2 h and the resin was washed and dried as before. A mixture of Fmoc-Thr(OtBu)-OH (4.0 eq., 11.93 g, 30 mmol), HOBT (4.0 eq., 4.05 g), HBTU (4.0 eq., 11.93 g) and DIEA (8.0 eq., 10.20 mL) dissolved in 150 mL of DMF was added to the Gly-Resin, and the reaction was stirred overnight. The resin was washed and dried as before. Fmoc deprotection was next carried out, followed by DCM/DMF washes. Subsequently, *t*-butyl deprotection was carried out with a 1:1 solution of TFA in DCM for 1 h. Upon further washes with DCM (3×), the resin was neutralized with 10% DIEA in DCM, followed by repeated washing with DCM (5×), DMF (5×) and MeOH (1×). Next, Fmoc-Lys(Mtt)-CHO (2.0 g) dissolved in 1% DIEA/MeOH was added to the resin in a 60 °C oil bath. After about 4 h, the resin was filtered, and washed 9 times with DCM/DMF, then dried *in vacuo*. A ninhydrin test for free amines tested negative and a chlorinyl test for a secondary amine tested positive to confirm the loading of the aldehyde.

Boc<sub>2</sub>O (10.0 eq.) was dissolved in DMF and DIEA (20.0 eq.) and combined with the resin, and allowed to stir for 2 h, and then washed 9 times with DCM/DMF. Mtt deprotection was carried out with 1% TFA in DCM for 30 min. Deprotection was confirmed with a positive ninhydrin test. The resin was washed as usual with DCM and DMF. The deprotected resin was added to D-biotin (4.0 eq.), HOBT (4.0 eq.), HBTU (4.0 eq.) and DIEA (8.0 eq.) in DMF. The reaction was stirred overnight and then washed with DCM/DMF. A negative ninhydrin test confirmed that the free primary amine group was no longer present. The resin was split into three different flasks and a different P<sub>2</sub> group (Figure 1B in maintext) was coupled overnight onto the resin in each of the flasks. In each flask, the standard couple reagents HOBT (4.0 eq.), HBTU (4.0 eq.) and DIEA (8.0 eq.) were dissolved in DMF in addition to Fmoc-AA-OH (4.0 eq.). The three different P<sub>2</sub> groups used were Leucine, Valine and Phenylalanine. Again, the resin was washed and dried as before. Finally, the resin from each flask was further divided into 45 equal portions and placed into separate microreactors, with each holding ~40 mg of the resin, and coded with an R<sub>f</sub> tag. Again, standard coupling reagents were used, with HOBT (4.0 eq.), HBTU (4.0 eq.) and DIEA (8.0 eq.) dissolved in DMF, and each of the 35 different acid building blocks. After the coupling completed, the resins were washed with DCM and DMF, and dried *in vacuo*.

In total, 105 compounds were synthesized on the resin. The resin-bound compounds were first separated into their own blue capped containers. Each container was added a ~1 mL of a deprotection cocktail containing 95% TFA and 5% TIS and the incubation was continued for 30 min. After a quick wash with DCM, 1 mL of a cleavage cocktail (acetonitrile/water/TFA = 60:40:0.1) was applied and the reaction was continued for 30 min at 60 °C. The microreactors were removed from the blue

Supplementary Material (ESI) for Chemical Communications

This journal is (c) The Royal Society of Chemistry 2011

cap containers and the product was concentrated to give the crude products. All compounds were characterized by LCMS and all were shown to be of correct molecular weight and most (> 95%) with sufficient purity (> 80%). They were used directly for subsequent microarray experiments. Below are representative LCMS profiles of selected compounds.

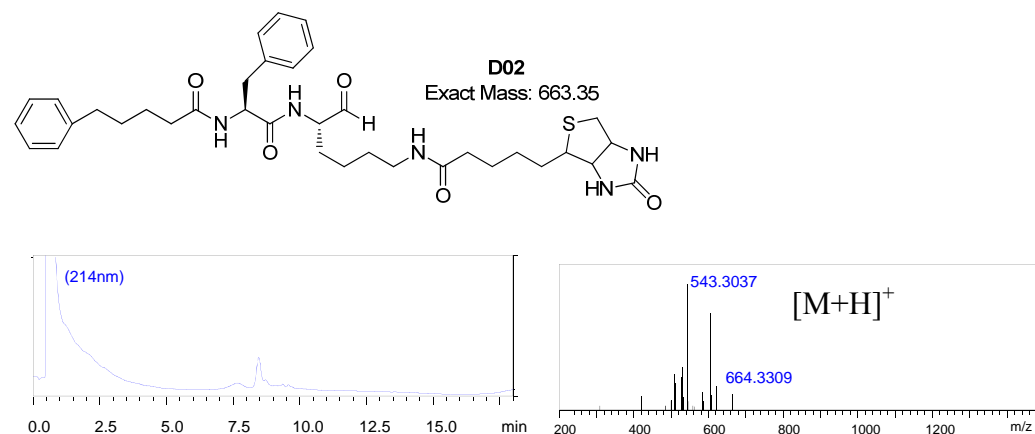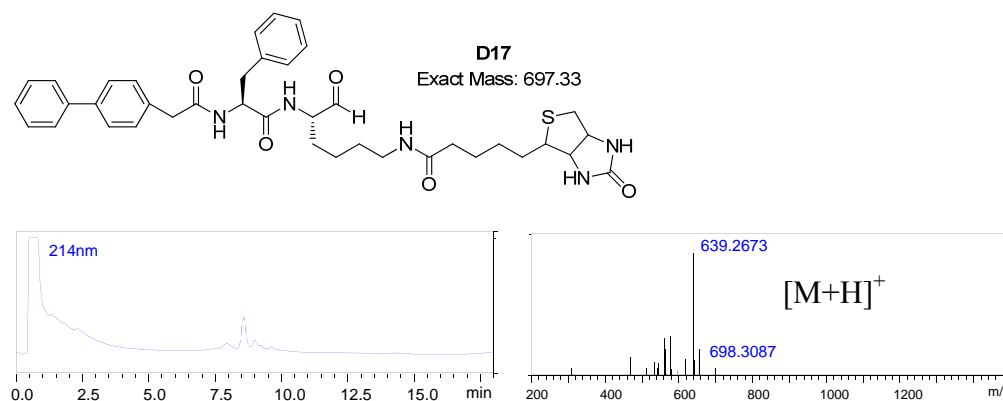

### 3. Gateway cloning and transfection.

The entry clone containing the Cathepsin L gene was from Human ORFenome Release 1 in the donor vector pDONR223. The LR reaction was performed using LR Clonase II using two different destination vectors (pDEST47 and pDEST53) following protocols provided by the vendor. The final constructs were named pDEST47-CTSL and pDEST53-CTSL, which contain C- and N-terminal GFP fusion, respectively. Gene size and sequence were confirmed again using PCR and DNA sequencing with attB1 and attB2 primers. Both the pDEST47-CTSL and pDEST53-CTSL were transiently transfected into HEK293T cells. Successful expression of the GFP-fused Cathepsin was confirmed by fluorescence microscopy and western blotting (Figure S1) using anti-GFP antibody (Santa Cruz, USA).

Supplementary Material (ESI) for Chemical Communications

This journal is (c) The Royal Society of Chemistry 2011

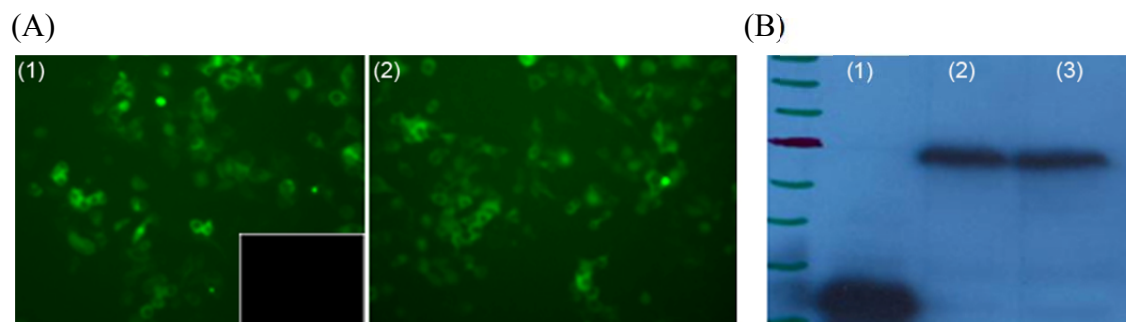

**Figure S1.** (A) One-photon excited fluorescence images of transfected HEK293T cells. (1) pDEST47-CTSL (C-terminal GFP fusion). Inset: negative control (no plasmid transfected); (2) pDEST53-CTSL (N-terminal GFP fusion). (B) Western blotting analysis of cell lysates from experiments in (A). Lane 1: 10 µg lysates of HEK293T cells transfected with control GFP plasmid (expected protein MW: 27KD); Lane 2: 10 µg lysates of HEK293T cells transfected with pDEST47-CTSL (expected protein MW: 68KD); Lane 3: 10 µg lysates of HEK293T cells transfected with pDEST53-CTSL (expected protein MW: 68KD).

#### 4. Microarray preparation.

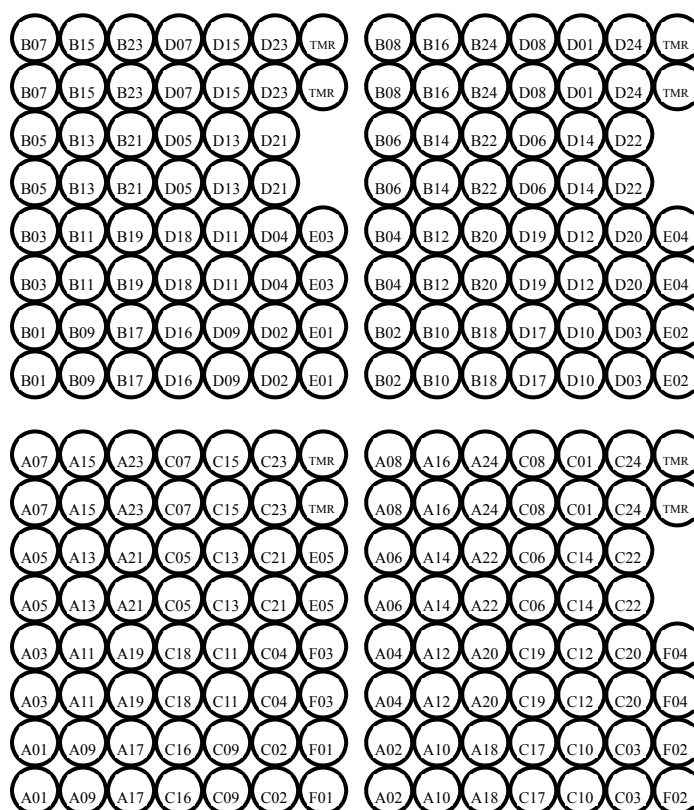

**Figure S2.** Spotting pattern of the small molecule library.

The microarray fabrication and compound immobilization were carried out following previously published protocols.<sup>1</sup> The spotting pattern and compound ID were shown in Table S1 and Figure S2. To screen the compound-immobilized SMM,

Supplementary Material (ESI) for Chemical Communications

This journal is (c) The Royal Society of Chemistry 2011

15  $\mu\text{L}$  of the above cell lysate (pDEST47-CTSL), containing over-expressed Cathepsin L, was added to 60  $\mu\text{L}$  of a NaOAc buffer (0.1 mol sodium acetate, pH 5.5, 1 mM EDTA and 4 mM dithiothreitol) to activate the enzyme. After 30 min, 15  $\mu\text{L}$  of 0.1% Tween 20 in NaOAc buffer and 60  $\mu\text{L}$  NaOAc buffer was added. Using a micropipette, approximately 40  $\mu\text{L}$  of this mixture was spread overtop the slide, in the sections where the compound had been printed. After 1.5 h, the mixture was washed off with deionized water and the slides were scanned under the Typhoon 9410 fluorescence scanner (GE Amersham) under the microarray setting.

## 5. Procedure for $\text{IC}_{50}$ evaluation against recombinant Cathepsin L.

$\text{IC}_{50}$  measurements were performed to determine the potency of two identified hits **D02** and **D17** against commercially available recombinant Cathepsin L. The dose-dependent inhibition assays were performed by varying the concentration of inhibitors under fixed enzyme and fluorogenic substrate Z-FR-AMC (Biotium) concentrations of 5 nM and 10  $\mu\text{M}$ , respectively. The fluorometric assays were performed in 384-well Greiner black plates, and the fluorescence readouts were monitored over 1.5 h assay runs using BioTek Multi-Mode Microplate Reader for fluorescence background at  $\lambda_{\text{ex}}/\lambda_{\text{em}} = 360/460$  nm. Kinetic endpoints were obtained and analyzed using GraphPad Prism software to plot out the  $\text{IC}_{50}$  graphs (Figure S3).

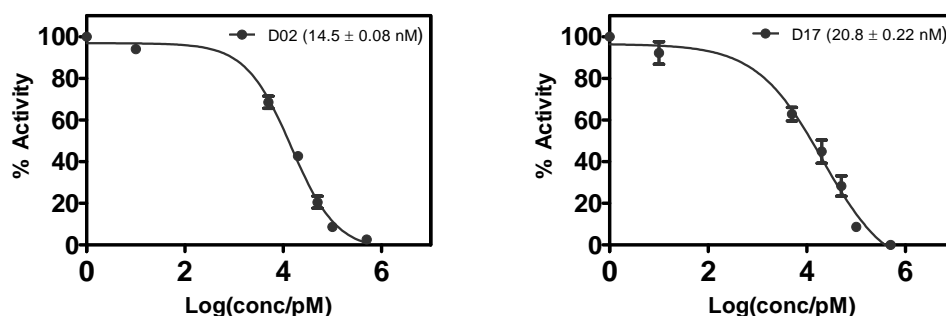

Figure S3.  $\text{IC}_{50}$  evaluation of **D02** and **D17** against Cathepsin L.

## 6. Synthesis of 2P probes (ZK-1) & (ZK-2).

(*S,E*)-*tert*-butyl(4-azido-1-((2-(ethyl(4-((4-nitrophenyl)diazenyl)phenyl)amino)ethyl)amino)-1-oxobutan-2-yl)carbamate (**2**). To a solution of **1** (100 mg, 0.32 mmol)<sup>2</sup> and Boc-Homoserine( $\text{N}_3$ )-OH (100 mg, 0.4 mmol) in DCM (10 mL) was added EDC (153 mg, 0.8 mmol). The resulting mixture was stirred at room temperature overnight. The reaction was quenched by addition of water (20 mL) which was extracted with ethyl acetate (20 mL  $\times$  2). The collected organic layer washed with water (20 mL  $\times$  2), brine (20 mL  $\times$  2), dried over anhydrous  $\text{Na}_2\text{SO}_4$  and concentrated *in vacuo*. The residue was purified by chromatography with hexane/ethyl acetate (4:1) to give the red powder (140 mg, 77% yield).  $^1\text{H}$  NMR (300 MHz,  $\text{CDCl}_3$ ):  $\delta$  8.29 (d,  $J = 9.0$  Hz, 2H), 7.87 (m, 4H), 6.80 (d,  $J = 9.0$  Hz, 2H), 6.67 (s, 1H) 5.20 (s, 1H), 4.22 (s, 1H) 3.54 (m, 5H), 2.83 (s, 1H) 2.07 (m, 1H), 1.90 (m, 1H), 1.44 (s, 9H), 1.23 (t,  $J = 6.9$  Hz, 3H);  $^{13}\text{C}$  NMR (75 MHz,  $\text{CDCl}_3$ )  $\delta$  171.1, 156.3, 151.4, 147.5, 143.1, 126.1, 124.6, 122.6,

Supplementary Material (ESI) for Chemical Communications

This journal is (c) The Royal Society of Chemistry 2011

111.4, 48.8, 46.3, 45.4, 37.3, 31.3, 28.2, 12.2; LC-MS(IT-TOF): calcd for  $[M+H]^+$  = 540.29, Found = 540.30.

*tert-butyl((S)-1-(((S)-4-azido-1-((2-(ethyl(4-((E)-(4-nitrophenyl)diazenyl)phenyl)amino)ethyl)amino)-1-oxobutan-2-yl)amino)-1-oxo-3-phenylpropan-2-yl)carbamate (3).* To a solution of **2** (140 mg, 0.26 mmol) in 10 mL DCM was added 3 mL TFA. The mixture was stirred at 0 °C for 1 h, then evaporated to dryness. Subsequently, 40 mL ethyl acetate was added, and the solution was washed with saturated aqueous NaHCO<sub>3</sub> solution (20 mL ×3) and Brine (20 mL ×3), dried over anhydrous Na<sub>2</sub>SO<sub>4</sub> and concentrated *in vacuo*. Further adding 20 mL DCM, Boc-Phe-OH (80 mg, 0.3 mmol), and EDC (76 mg, 0.4 mmol), the resulting mixture was stirred at room temperature overnight. After quenched by water (20 mL), the solution was extracted with ethyl acetate (40 mL ×2). The collected organic layer was washed with water (20 mL ×2), brine (20 mL ×2), dried over anhydrous Na<sub>2</sub>SO<sub>4</sub> and concentrated *in vacuo*. The residue was purified by chromatography with hexane/ethyl acetate (4:1) to give the red powder (153 mg, 86% yield). <sup>1</sup>H NMR (300 MHz, DMSO-*d*<sub>6</sub>): δ 8.33 (d, *J* = 9.0 Hz, 2H), 8.16 (s, 1H), 8.13 (s, 1H), 7.93 (d, *J* = 9.0 Hz 2H), 7.82 (d, *J* = 9.0 Hz 2H), 7.27 (d, *J* = 8.0 Hz, 2H), 7.19 (m, 1H), 7.06 (d, *J* = 8.0 Hz, 2H), 6.95 (d, *J* = 8.0 Hz, 2H), 4.32 (m, 1H), 4.16 (m, 1H), 3.49 (m, 4H), 3.30 (m, 2H), 2.97 (m, 1H), 1.87 (m, 1H), 1.76 (m, 1H), 1.44 (s, 9H), 1.23 (t, *J* = 6.9 Hz, 3H); <sup>13</sup>C NMR (75 MHz, DMSO-*d*<sub>6</sub>) δ 172.2, 171.1, 156.3, 155.4, 152.4, 147.5, 143.1, 138.3, 129.6, 128.4, 126.5, 125.3, 122.6, 111.4, 78.53, 56.28, 48.8, 47.3, 45.4, 37.3, 36.9, 31.3, 28.2, 12.2; LC-MS(IT-TOF): calcd for  $[M+H]^+$  = 687.30, Found = 687.31.

*N-((S)-1-(((S)-4-azido-1-((2-(ethyl(4-((E)-(4-nitrophenyl)diazenyl)phenyl)amino)ethyl)amino)-1-oxobutan-2-yl)amino)-1-oxo-3-phenylpropan-2-yl)-5-phenylpentanamide (4).* To a solution of **3** (153 mg, 0.22 mmol) in 10 mL DCM was added 3 mL TFA. The mixture was stirred at 0 °C for 1 h, then evaporated the solvent and TFA, added 40 mL ethyl acetate, washed with saturated aqueous NaHCO<sub>3</sub> solution (20 mL ×3) and Brine (20 mL ×3), dried over anhydrous Na<sub>2</sub>SO<sub>4</sub> and concentrated *in vacuo*. Further adding 20 mL DCM, 5-phenylpentanoic acid (55 mg, 0.3 mmol), and EDC (76 mg, 0.4 mmol), the mixture was stirred at room temperature overnight. After being quenched by water (20 mL), the solution was extracted with ethyl acetate (40 mL ×2). The collected organic layer was washed with water (20 mL ×2), brine (20 mL ×2), dried over anhydrous Na<sub>2</sub>SO<sub>4</sub> and concentrated *in vacuo*. The residue was purified by chromatography with hexane/ethyl acetate (1:1) to give the red powder (130 mg, 84% yield). <sup>1</sup>H NMR (300 MHz, DMSO-*d*<sub>6</sub>): δ 8.34 (d, *J* = 9.0 Hz, 2H), 8.16 (d, *J* = 9.0 Hz, 1H), 8.13 (d, *J* = 9.0 Hz, 1H), 7.93 (d, *J* = 9.0 Hz 2H), 7.83 (d, *J* = 9.0 Hz 2H), 7.24 (m, 5H), 7.13 (m, 5H), 6.95 (d, *J* = 8.0 Hz, 2H), 4.49 (m, 1H), 4.26 (m, 1H), 3.46 (m, 4H), 3.30 (m, 2H), 2.99 (m, 1H), 2.87 (s, 1H), 2.83 (m, 1H), 2.76 (s, 1H), 2.30 (s, 1H), 2.17 (s, 1H), 1.89 (m, 1H), 1.78 (m, 1H), 1.36 (m, 5H), 1.27 (m, 2H), 1.23 (t, *J* = 6.9 Hz, 3H); <sup>13</sup>C NMR (75 MHz, DMSO-*d*<sub>6</sub>) δ 172.2, 171.6, 171.1, 156.3, 152.4, 147.5, 142.1, 129.6, 128.6, 128.4, 128.3, 126.5, 125.9, 125.4, 122.8, 111.8, 54.28, 50.1, 48.8, 47.3, 45.4, 37.3, 35.9, 31.3, 30.4, 29.2, 25.5, 22.5, 12.2;

Supplementary Material (ESI) for Chemical Communications

This journal is (c) The Royal Society of Chemistry 2011

LC-MS(IT-TOF): calcd for  $[M+H]^+ = 747.37$ , Found = 747.38.

*(S)*-2-((*S*)-2-(2-([1,1'-biphenyl]-4-yl)acetamido)-3-phenylpropanamido)-4-azido-*N*-(2-(ethyl(4-((*E*)-(4-nitrophenyl)diazenyl)phenyl)amino)ethyl)butanamide (5).

Compound **5** was synthesized based on the same procedure as **4** by using 2-((1,1'-biphenyl)-4-yl)acetic acid to afford red powder (137 mg, 85% yield).  $^1\text{H}$  NMR (300 MHz, DMSO- $d_6$ ):  $\delta$  8.43 (d,  $J = 9.0$  Hz, 2H), 8.34 (d,  $J = 9.0$  Hz, 2H), 8.25 (d,  $J = 9.0$  Hz, 2H), 8.06 (m, 1H), 7.93 (d,  $J = 9.0$  Hz, 2H), 7.86 (d,  $J = 9.0$  Hz, 2H), 7.58 (d,  $J = 9.0$  Hz, 2H), 7.48 (d,  $J = 9.0$  Hz, 2H), 7.43 (d,  $J = 9.0$  Hz, 2H), 7.36 (m, 1H), 7.24 (m, 4H), 7.21 (m, 3H), 6.95 (d,  $J = 8.0$  Hz, 2H), 4.55 (m, 1H), 4.27 (m, 1H), 3.46 (m, 4H), 3.30 (m, 2H), 2.99 (m, 1H), 2.87 (s, 1H), 2.83 (m, 1H), 2.76 (s, 1H), 2.30 (s, 1H), 2.17 (s, 1H), 1.89 (m, 1H), 1.78 (m, 1H), 1.24 (t,  $J = 6.9$  Hz, 3H);  $^{13}\text{C}$  NMR (75 MHz, DMSO- $d_6$ )  $\delta$  171.6, 171.4, 170.3, 156.3, 152.4, 147.5, 142.1, 140.3, 138.6, 138.1, 135.8, 129.8, 129.6, 129.2, 128.6, 127.4, 126.5, 125.9, 122.8, 111.8, 55.28, 50.1, 48.8, 47.3, 45.4, 42.4, 37.3, 35.9, 31.3, 12.2; LC-MS(IT-TOF): calcd for  $[M+H]^+ = 781.35$ , Found = 781.36.

**ZK-1.** Compound **4** (100 mg, 13 mmol) and the corresponding alkyne-containing dye **DL-1** (67 mg, 14 mmol) were suspended in a mixture of DMSO/acetonitrile (2:1) (9 mL). To the suspension was added CuI (25 mg, 14 mmol) and DIEA (50  $\mu\text{L}$ ). The resulting mixture was stirred at room temperature for 48 h. Then the product was directly purified by preparative HPLC with elution gradients using acetonitrile (0.1% TFA) and water (0.1% TFA) to give the final product 13 mg.  $^1\text{H}$  NMR (300 MHz, DMSO- $d_6$ ):  $\delta$  8.33 (m, 3H), 8.15 (m, 3H), 7.99 (m, 2H), 7.84 (d, 3H), 7.76 (m, 2H), 7.57 (d, 3H), 7.25 (m, 12H), 7.05 (m, 3H), 6.9 (m, 5H), 5.6 (m, 2H), 4.51 (m, 1H), 4.35 (m, 2H), 4.20 (m, 2H), 3.46 (m, 11H), 3.27 (m, 2H), 2.99 (m, 1H), 2.87 (s, 1H), 2.83 (m, 2H), 2.18 (m, 1H), 2.08 (m, 3H), 1.40 (m, 4H), 1.08 (m, 16H);  $^{13}\text{C}$  NMR (75 MHz, DMSO- $d_6$ )  $\delta$  173.6, 172.16, 171.3, 164.67, 156.3, 151.4, 147.5, 142.3, 138.25, 135.8, 128.54, 128.37, 126.5, 125.24, 122.79, 111.8, 110.05, 60.35, 54.32, 50.56, 46.5, 45.21, 37.3, 35.3, 35.18, 32.64, 30.69, 25.07, 12.4; LC-MS(IT-TOF): calcd for  $[M+H]^+ = 1227.65$ , Found = 1227.68.

**ZK-2** was synthesized using the same procedure as **ZK-1** by using compound **5** to afford the final product 10 mg.  $^1\text{H}$  NMR (300 MHz, DMSO- $d_6$ ):  $\delta$  8.43 (m, 2H), 8.34 (m, 2H), 8.15 (m, 3H), 8.05 (m, 2H), 7.81 (d, 5H), 7.47 (m, 10H), 7.25 (m, 10H), 6.90 (m, 6H), 5.60 (m, 2H), 4.51 (m, 1H), 4.35 (m, 2H), 4.20 (m, 2H), 3.46 (m, 7H), 3.27 (m, 2H), 2.99 (m, 1H), 2.87 (s, 1H), 2.83 (m, 2H), 2.49 (m, 4H), 1.08 (m, 16H);  $^{13}\text{C}$  NMR (75 MHz, DMSO- $d_6$ )  $\delta$  172.9, 171.2, 165.5, 164.6, 156.7, 154.7, 151.9, 147.3, 143.1, 142.3, 138.25, 137.9, 135.8, 129.2, 129.4, 128.54, 128.37, 126.8, 126.5, 125.28, 122.79, 111.8, 111.6, 66.35, 65.21, 63.77, 54.32, 54.32, 45.14, 35.18, 34.13, 29.51, 12.4; LC-MS(IT-TOF): calcd for  $[M+H]^+ = 1161.64$ , Found = 1161.65.

## 7. Cell culture and imaging.

Supplementary Material (ESI) for Chemical Communications

This journal is (c) The Royal Society of Chemistry 2011

HepG2 cells were seeded in glass-bottom dishes (Mattek) and grown till 70~80% confluency. Subsequently, the cells were incubated with **ZK-1** or **ZK-2** (2  $\mu$ M prepared in fresh media) for 2 h, then further incubated with 0.25  $\mu$ g/mL of the lysosomal tracker (LysoTracker<sup>®</sup> Red DND-99). Cells were next washed with PBS three times, then imaged with the Leica TCS SP5X Confocal Microscope System equipped with Leica HCX PL APO 63x/1.20 W COPP CS, 405 nm Diode laser, White laser (470 nm to 670 nm, with 1 nm increments, with 8 channels AOT for simultaneous control of 8 laser lines, each excitation wavelength provides 1.5 mV), and Ti-Sapphire laser (~4 W at 800 nm) with PMT detector ranging from 420 nm to 700 nm for one-photon excited fluorescence. All images were processed with Leica Application Suite Advanced Fluorescence (LAS AF, Figure 3 in the maintext).

## 8. References

1. H. Wu, J. Ge, P. Yang, M. Uttamchandani, and S. Q. Yao, *J. Am. Chem. Soc.*, **2011**, *133*, 1946-1954.
2. A. Michaela, H. Markus, B. Klaus and M. Ronald, *Chembiochem.* **2011**, *12*, 47-51.



Supplementary Material (ESI) for Chemical Communications

This journal is (c) The Royal Society of Chemistry 2011

Table S1. Compound ID and the corresponding printing pattern.

| Printing Pattern | Structure      |                | MW Exp | MW Obs |
|------------------|----------------|----------------|--------|--------|
|                  | P <sub>2</sub> | P <sub>3</sub> |        |        |
| A01              |                |                | 601.33 | 602.34 |
| A02              |                |                | 598.29 | 599.26 |
| A03              |                |                | 609.28 | 610.26 |
| A04              |                |                | 629.39 | 630.37 |
| A05              |                |                | 661.35 | 662.32 |
| A06              |                |                | 563.31 | 564.45 |
| A07              |                |                | 565.31 | 566.47 |
| A08              |                |                | 587.29 | 588.45 |
| A09              |                |                | 635.80 | 636.67 |
| A10              |                |                | 536.28 | 537.31 |

Supplementary Material (ESI) for Chemical Communications

This journal is (c) The Royal Society of Chemistry 2011

|     |                                                                                     |                                                                                      |        |        |
|-----|-------------------------------------------------------------------------------------|--------------------------------------------------------------------------------------|--------|--------|
| A11 |    |     | 567.35 | 568.56 |
| A12 |    |     | 607.38 | 608.74 |
| A13 |    |     | 631.24 | 632.21 |
| A14 |    |     | 635.32 | 636.76 |
| A15 |    |     | 605.30 | 606.31 |
| A16 |   |    | 601.33 | 602.45 |
| A17 |  |   | 631.34 | 632.67 |
| A18 |  |   | 651.29 | 652.18 |
| A19 |  |  | 663.35 | 664.21 |
| A20 |  |   | 605.30 | 606.46 |
| A21 |  |   | 573.30 | 574.65 |

Supplementary Material (ESI) for Chemical Communications

This journal is (c) The Royal Society of Chemistry 2011

|     |                                                                                     |                                                                                     |        |        |
|-----|-------------------------------------------------------------------------------------|-------------------------------------------------------------------------------------|--------|--------|
| A22 |    |    | 591.29 | 592.51 |
| A23 |    |    | 601.33 | 602.56 |
| A24 |    |    | 601.33 | 602.36 |
| B01 |    |    | 599.31 | 600.56 |
| B02 |    |    | 637.33 | 638.56 |
| B03 |  |   | 659.28 | 660.84 |
| B04 |  |  | 663.25 | 664.67 |
| B05 |  |  | 591.29 | 592.67 |
| B06 |  |  | 599.31 | 600.57 |
| B07 |  |  | 627.27 | 628.65 |
| B08 |  |  | 636.27 | 636.78 |

Supplementary Material (ESI) for Chemical Communications

This journal is (c) The Royal Society of Chemistry 2011

|     |                                                                                     |                                                                                     |        |        |
|-----|-------------------------------------------------------------------------------------|-------------------------------------------------------------------------------------|--------|--------|
| B09 |    |    | 623.31 | 624.72 |
| B10 |    |    | 574.29 | 575.41 |
| B11 |    |    | 603.31 | 604.41 |
| B12 |    |    | 587.31 | 588.42 |
| B13 |    |    | 584.28 | 585.27 |
| B14 |    |   | 595.20 | 596.26 |
| B15 |  |  | 615.35 | 616.38 |
| B16 |  |  | 647.38 | 648.41 |
| B17 |  |  | 549.30 | 550.45 |
| B18 |  |  | 551.31 | 552.47 |
| B19 |  |  | 573.28 | 574.71 |
| B20 |  |  | 621.25 | 622.64 |
| B21 |  |  | 522.26 | 523.43 |
| B22 |  |  | 553.33 | 554.43 |
| B23 |  |  | 593.36 | 594.37 |
| B24 |  |  | 617.22 | 618.32 |

Supplementary Material (ESI) for Chemical Communications

This journal is (c) The Royal Society of Chemistry 2011

|     |                                                                                     |                                                                                      |        |        |
|-----|-------------------------------------------------------------------------------------|--------------------------------------------------------------------------------------|--------|--------|
| C01 |    |     | 621.30 | 622.31 |
| C02 |    |     | 591.21 | 591.23 |
| C03 |    |     | 587.31 | 587.53 |
| C04 |    |     | 617.32 | 618.39 |
| C05 |   |    | 637.27 | 638.45 |
| C06 |  |  | 649.33 | 650.43 |
| C07 |  |   | 591.29 | 592.41 |
| C08 |  |   | 559.28 | 560.41 |
| C09 |  |   | 577.27 | 578.37 |
| C10 |  |   | 587.31 | 588.34 |
| C11 |  |   | 587.31 | 588.56 |

Supplementary Material (ESI) for Chemical Communications

This journal is (c) The Royal Society of Chemistry 2011

|     |                                                                                     |                                                                                     |        |        |
|-----|-------------------------------------------------------------------------------------|-------------------------------------------------------------------------------------|--------|--------|
| C12 |    |    | 585.30 | 586.45 |
| C13 |    |    | 623.31 | 624.34 |
| C14 |    |    | 645.26 | 646.36 |
| C15 |    |    | 649.24 | 650.43 |
| C16 |    |    | 577.27 | 578.56 |
| C17 |  |   | 585.30 | 586.41 |
| C18 |  |  | 613.25 | 614.36 |
| C19 |  |  | 622.26 | 623.46 |
| C20 |  |  | 609.30 | 610.41 |
| C21 |  |  | 560.28 | 561.18 |
| C22 |  |  | 589.29 | 590.41 |
| C23 |  |  | 635.31 | 636.45 |

Supplementary Material (ESI) for Chemical Communications

This journal is (c) The Royal Society of Chemistry 2011

|     |                                                                                     |                                                                                     |        |        |
|-----|-------------------------------------------------------------------------------------|-------------------------------------------------------------------------------------|--------|--------|
| C24 |    |    | 632.28 | 633.34 |
| D01 |    |    | 643.26 | 644.29 |
| D02 |    |    | 663.35 | 664.33 |
| D03 |    |    | 695.35 | 696.41 |
| D04 |    |    | 597.30 | 598.41 |
| D05 |   |   | 599.31 | 600.45 |
| D06 |  |  | 621.28 | 622.31 |
| D07 |  |  | 669.25 | 670.71 |
| D08 |  |  | 570.26 | 571.17 |
| D09 |  |  | 601.33 | 602.31 |
| D10 |  |  | 641.36 | 642.54 |
| D11 |  |  | 665.12 | 666.09 |
| D12 |  |  | 669.30 | 670.41 |

Supplementary Material (ESI) for Chemical Communications

This journal is (c) The Royal Society of Chemistry 2011

|     |                                                                                     |                                                                                     |        |        |
|-----|-------------------------------------------------------------------------------------|-------------------------------------------------------------------------------------|--------|--------|
| D13 |    |    | 639.29 | 640.34 |
| D14 |    |    | 635.31 | 636.36 |
| D15 |    |    | 665.32 | 666.20 |
| D16 |    |    | 685.27 | 686.31 |
| D17 |   |  | 697.33 | 698.38 |
| D18 |  |  | 639.29 | 640.28 |
| D19 |  |  | 607.28 | 608.34 |
| D20 |  |  | 625.27 | 627.19 |
| D21 |  |  | 635.31 | 636.29 |
| D22 |  |  | 635.31 | 636.45 |
| D23 |  |  | 633.30 | 634.61 |



Supplementary Material (ESI) for Chemical Communications

This journal is (c) The Royal Society of Chemistry 2011

|     |                                                                                     |                                                                                     |        |        |
|-----|-------------------------------------------------------------------------------------|-------------------------------------------------------------------------------------|--------|--------|
| D24 |    |    | 671.31 | 672.40 |
| E01 |    |    | 693.26 | 694.15 |
| E02 |    |    | 697.24 | 698.25 |
| E03 |    |    | 625.27 | 626.21 |
| E04 |    |    | 633.30 | 634.45 |
| E05 |   |   | 661.25 | 662.27 |
| F01 |  |  | 670.26 | 671.35 |
| F02 |  |  | 657.30 | 658.31 |
| F03 |  |  | 608.28 | 609.23 |
| F04 |  |  | 637.29 | 638.41 |

Supplementary Material (ESI) for Chemical Communications

This journal is (c) The Royal Society of Chemistry 2011

## 9. $^1\text{H}$ and $^{13}\text{C}$ NMR.

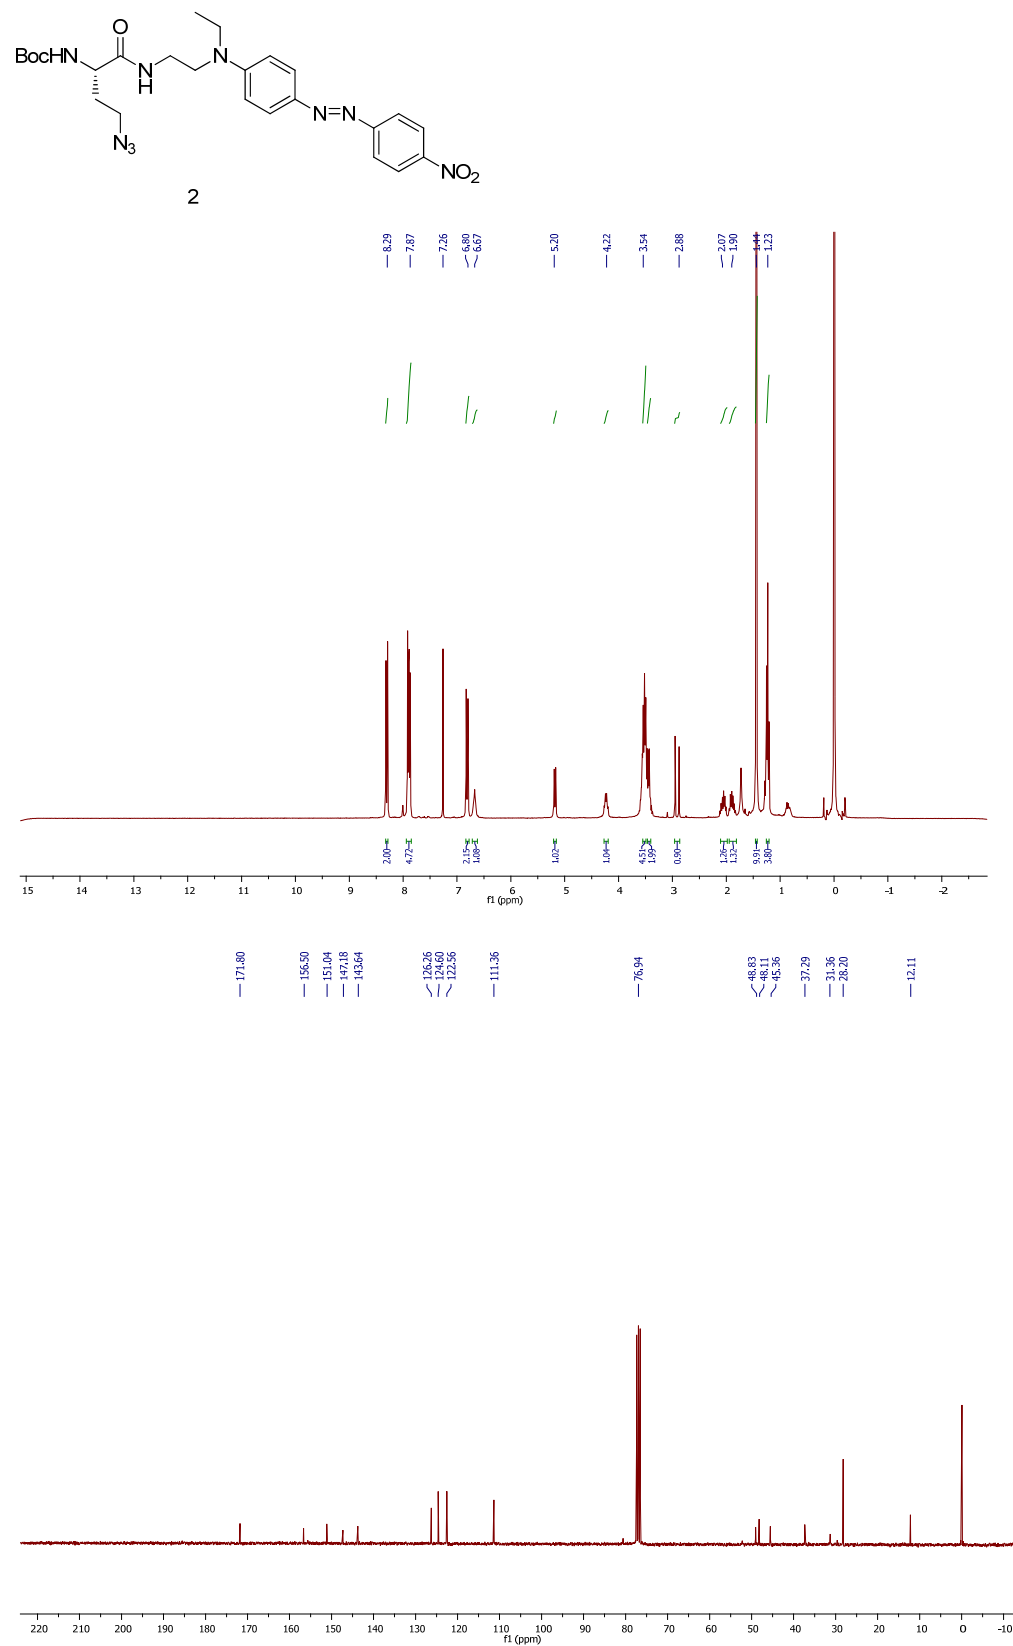

Supplementary Material (ESI) for Chemical Communications

This journal is (c) The Royal Society of Chemistry 2011

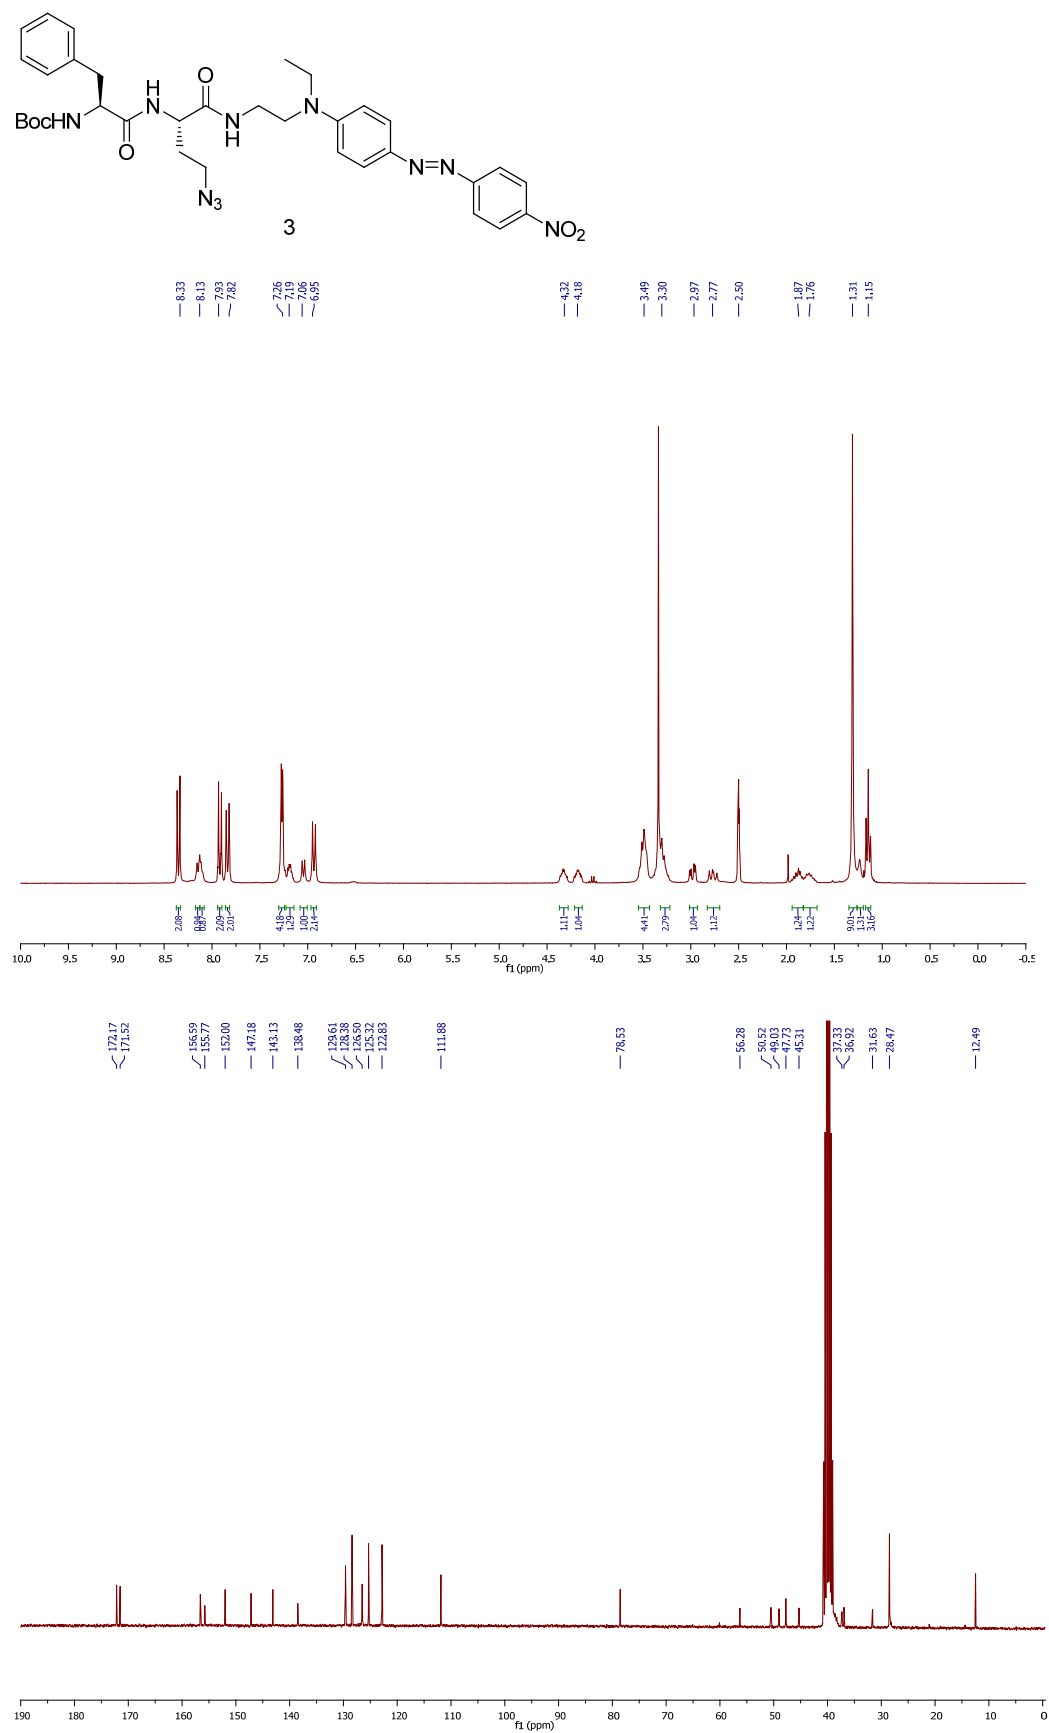

Supplementary Material (ESI) for Chemical Communications

This journal is (c) The Royal Society of Chemistry 2011

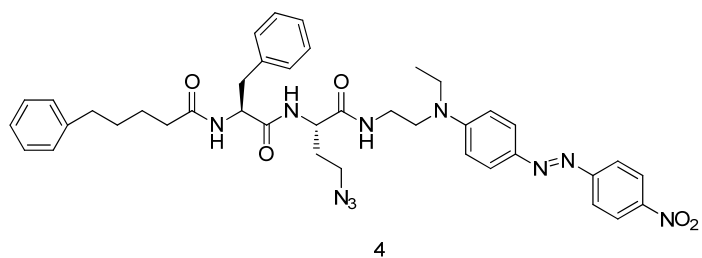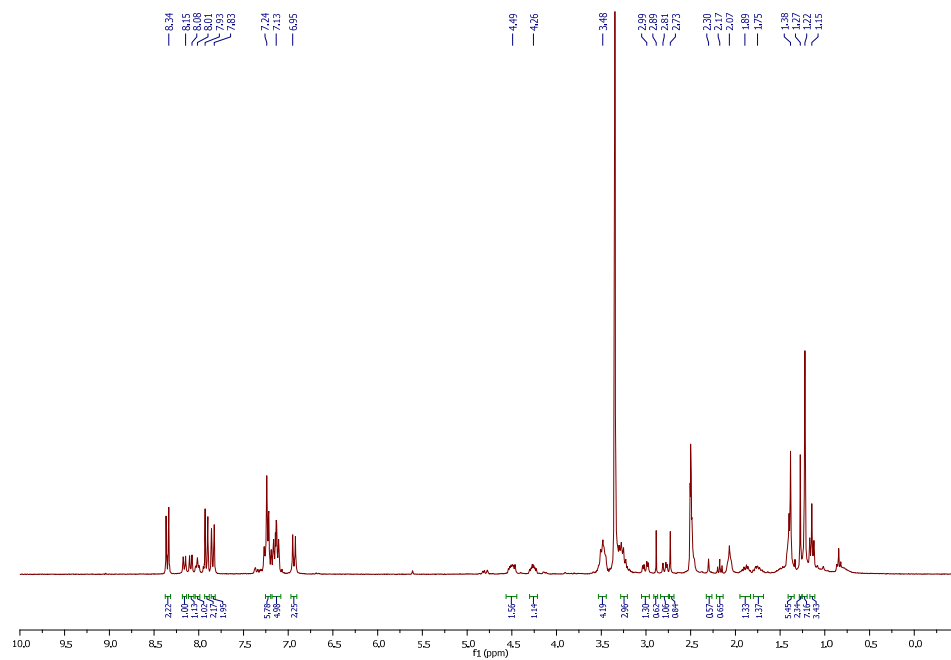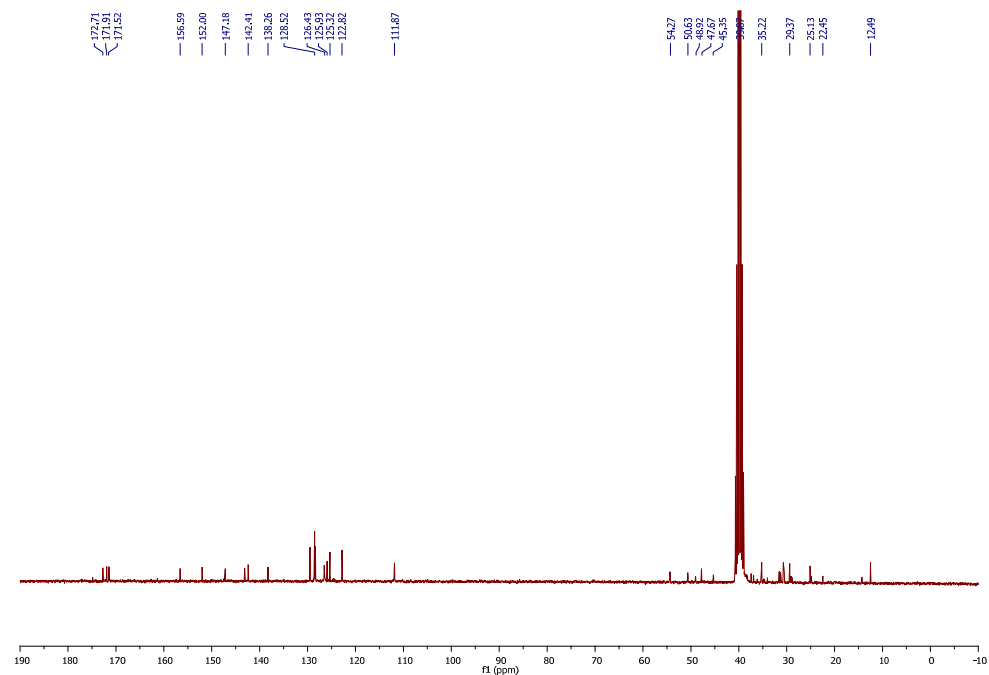

Supplementary Material (ESI) for Chemical Communications

This journal is (c) The Royal Society of Chemistry 2011

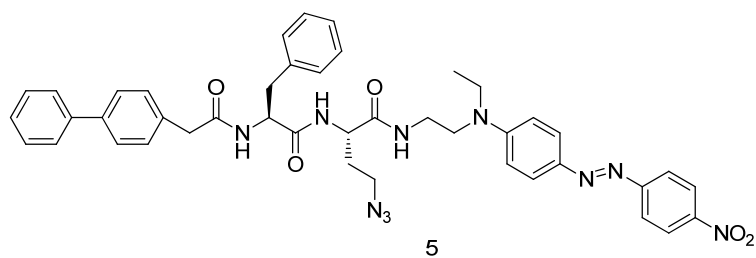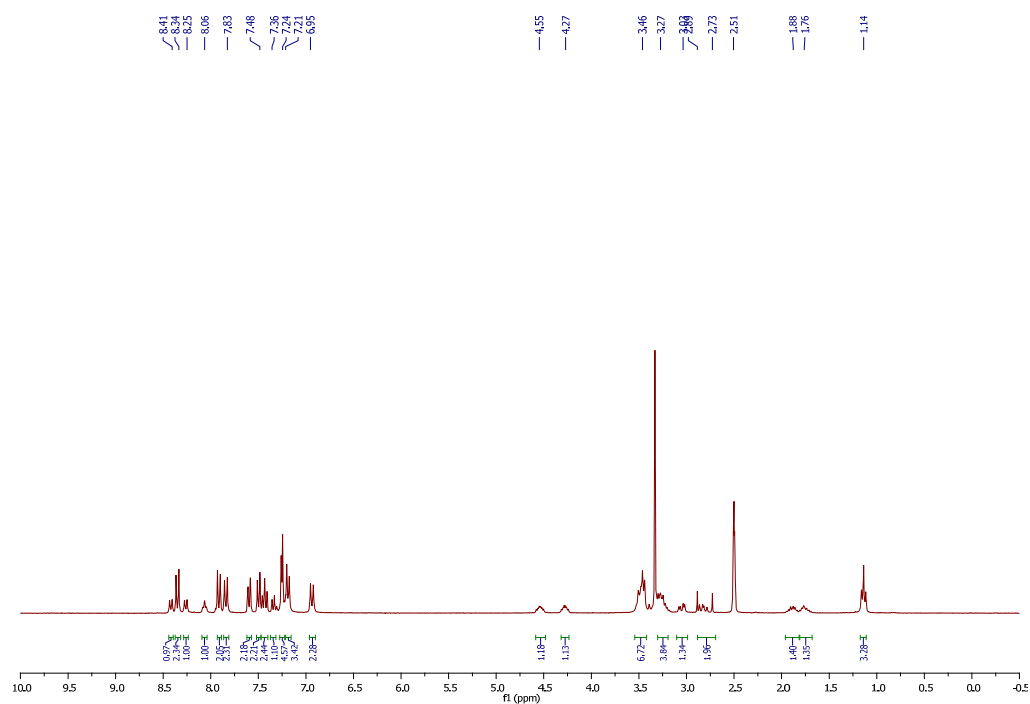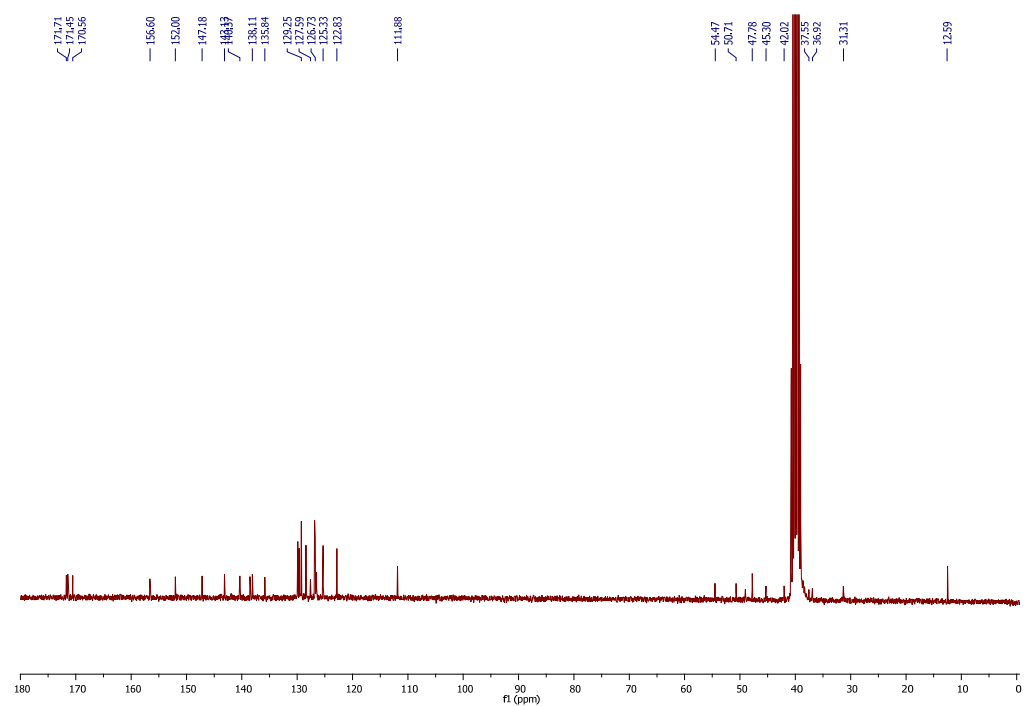

Supplementary Material (ESI) for Chemical Communications

This journal is (c) The Royal Society of Chemistry 2011

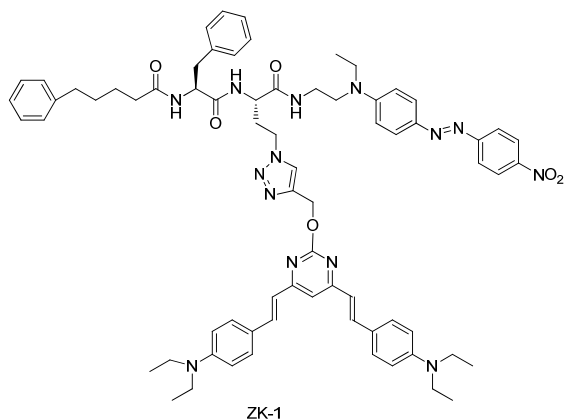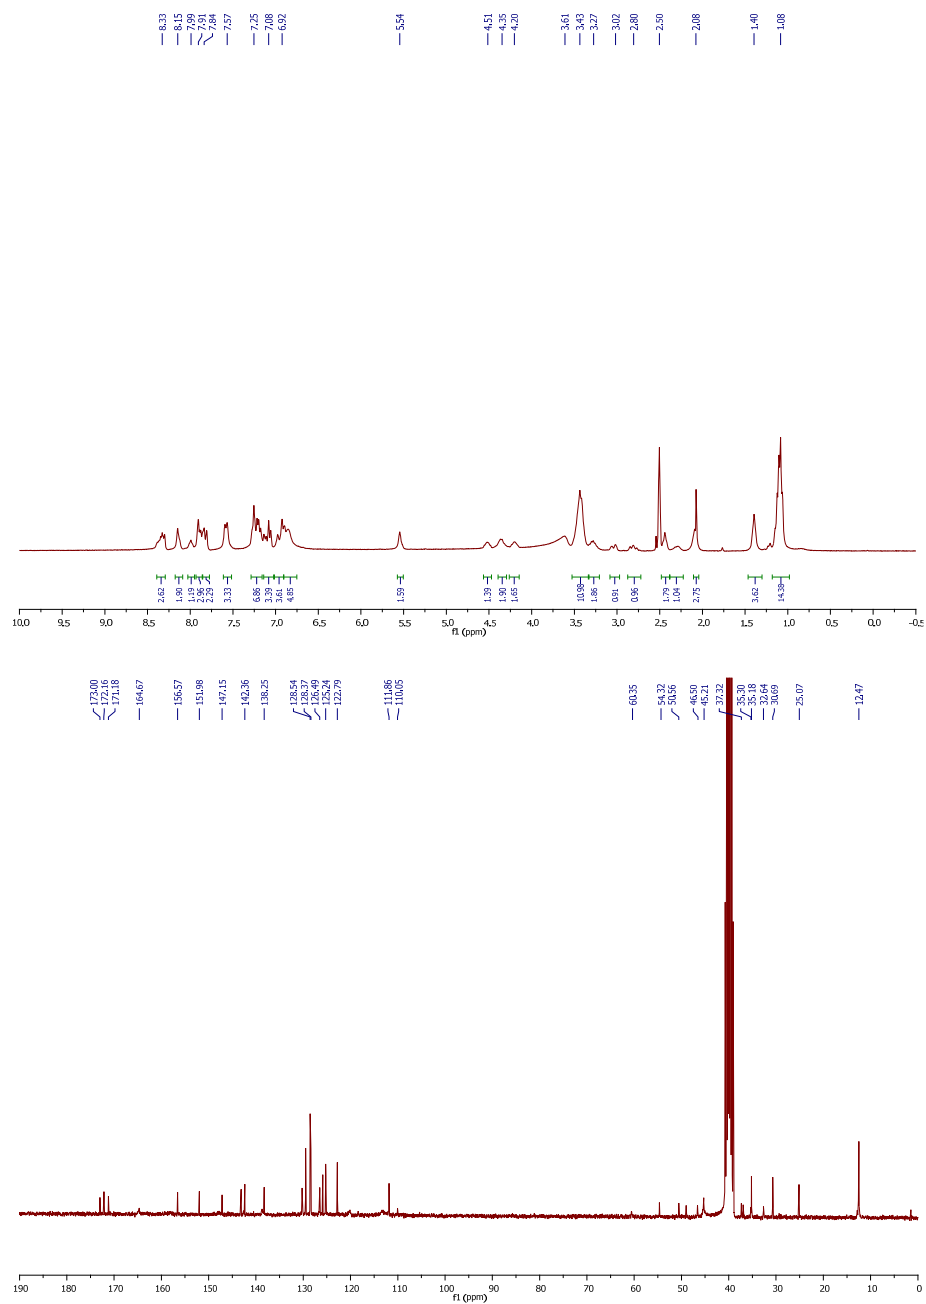

Supplementary Material (ESI) for Chemical Communications

This journal is (c) The Royal Society of Chemistry 2011

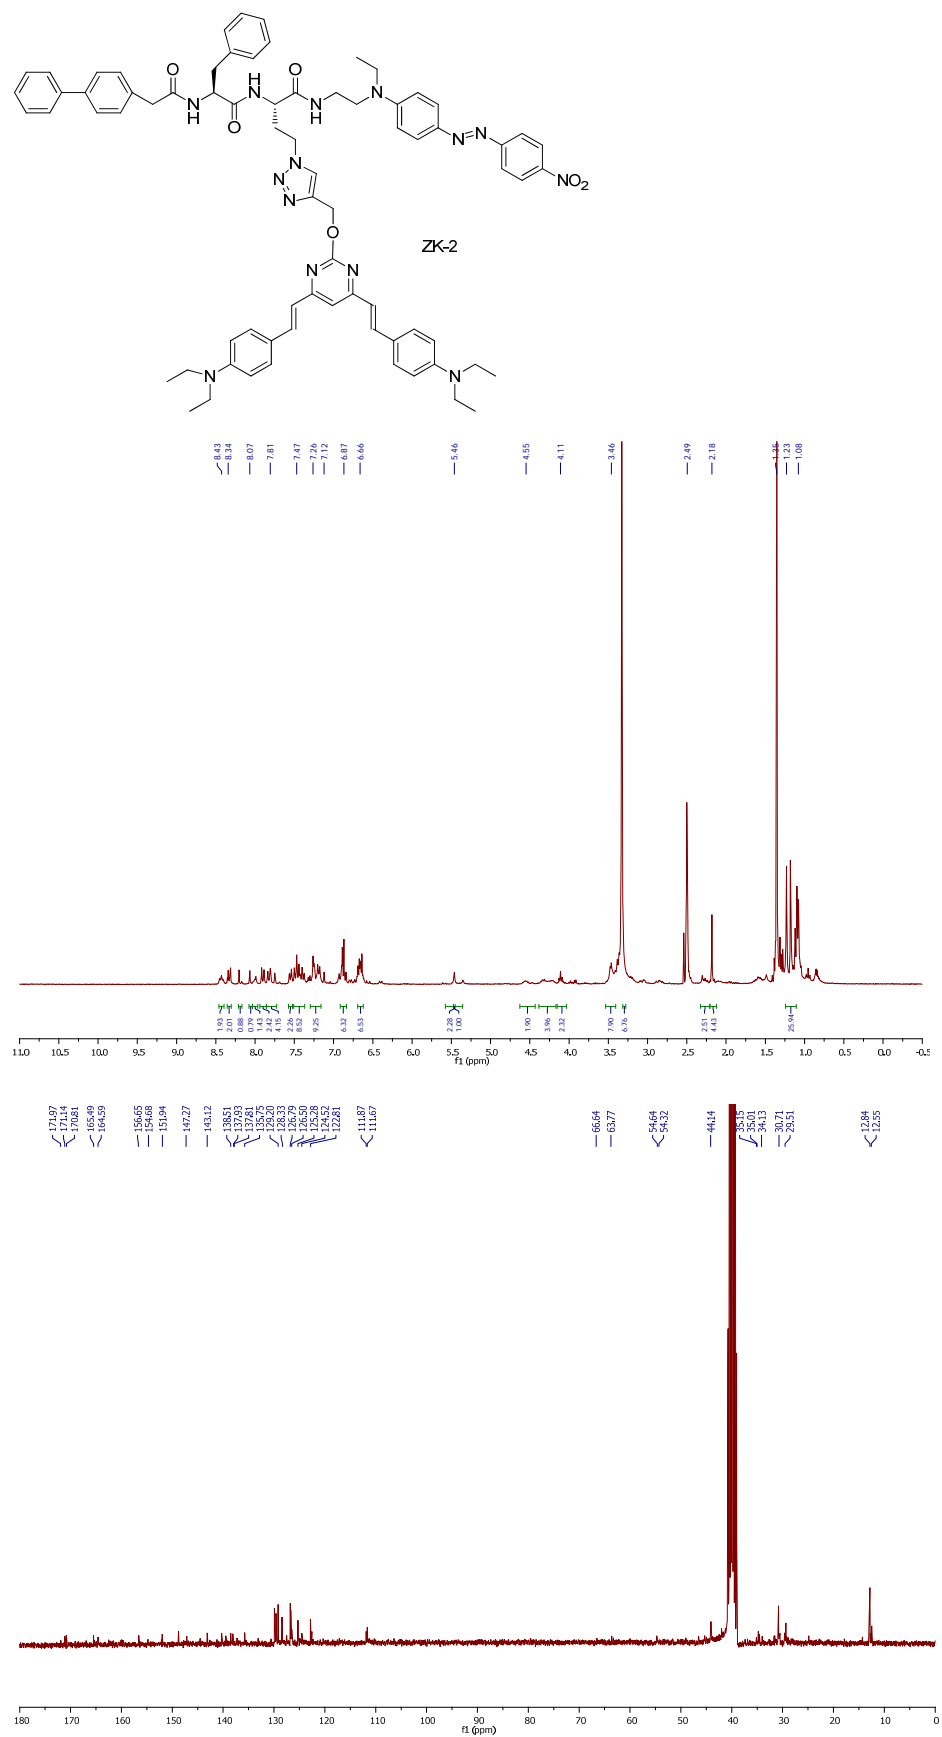

Supplement: c2cc33476c.pdf [file c2cc33476c.pdf]
